# Supplementary material for: A spectral-domain optical coherence tomographic analysis of Rdh5-/- mice retina
Source: PubMed Central journal article supplement (PMC7144952; doi:10.1371/journal.pone.0231220), 2020-04-09
Supplement: pone.0231220.s002.pdf [file pone.0231220.s002.pdf]

## Retinal layer thickness of C57BL/6J

| Age (PM)<br>number | Inner Retinal Layer (A)<br>NFL, GCL, IPL, INL | Outer Retinal Layer (B)<br>OPL, ONL | IS/OS Layer (C)<br>IS, OS | RPE + choroid Layer (D)<br>RPE, choroid |
|--------------------|-----------------------------------------------|-------------------------------------|---------------------------|-----------------------------------------|
| PM1                |                                               |                                     |                           |                                         |
| 1                  | 91.441                                        | 70.589                              | 33.066                    | 31.225                                  |
| 2                  | 93.521                                        | 64.051                              | 39.807                    | 29.978                                  |
| 3                  | 88.046                                        | 66.351                              | 40.361                    | 33.228                                  |
| 4                  | 89.376                                        | 63.997                              | 39.95                     | 38.493                                  |
| mean ± SD          | 90.596 ± 2.399                                | 66.247 ± 3.096                      | 38.296 ± 3.495            | 33.231 ± 3.755                          |
| PM2                |                                               |                                     |                           |                                         |
| 1                  | 82.673                                        | 68.891                              | 44.821                    | 35.491                                  |
| 2                  | 84.091                                        | 63.793                              | 42.846                    | 30.9                                    |
| 3                  | 86.075                                        | 64.615                              | 37.319                    | 30.512                                  |
| 4                  | 88.656                                        | 66.394                              | 36.139                    | 36.212                                  |
| mean ± SD          | 85.374 ± 2.595                                | 65.923 ± 2.257                      | 40.281 ± 4.281            | 33.279 ± 2.990                          |
| PM3                |                                               |                                     |                           |                                         |
| 1                  | 86.352                                        | 66.668                              | 36.347                    | 36.96                                   |
| 2                  | 92.014                                        | 69.398                              | 47.181                    | 34.945                                  |
| 3                  | 109.557                                       | 66.947                              | 42.419                    | 33.532                                  |
| 4                  | 87.982                                        | 67.253                              | 41.051                    | 31.859                                  |
| mean ± SD          | 93.976 ± 10.656                               | 67.567 ± 1.244                      | 41.750 ± 4.458            | 34.324 ± 2.163                          |
| PM4                |                                               |                                     |                           |                                         |
| 1                  | 90.025                                        | 71.851                              | 47.854                    | 29.422                                  |
| 2                  | 87.359                                        | 66.825                              | 44.644                    | 33.327                                  |
| 3                  | 85.157                                        | 68.026                              | 43.692                    | 33.11                                   |
| 4                  | 85.966                                        | 68.067                              | 43.588                    | 37.506                                  |
| mean ± SD          | 87.127 ± 2.136                                | 68.692 ± 2.183                      | 44.945 ± 1.997            | 33.341 ± 3.305                          |
| PM5                |                                               |                                     |                           |                                         |
| 1                  | 89.052                                        | 68.679                              | 39.985                    | 36.087                                  |
| 2                  | 94.119                                        | 72.767                              | 45.038                    | 35.207                                  |
| 3                  | 89.143                                        | 65.654                              | 41.136                    | 38.892                                  |
| 4                  | 90.117                                        | 68.214                              | 42.643                    | 37.452                                  |
| 5                  | 91.244                                        | 70.877                              | 48.61                     | 34.218                                  |
| 6                  | 95.022                                        | 70.374                              | 46.998                    | 34.819                                  |
| mean ± SD          | 91.450 ± 2.560                                | 69.428 ± 2.467                      | 44.068 ± 3.390            | 36.113 ± 1.767                          |
| PM6                |                                               |                                     |                           |                                         |
| 1                  | 88.425                                        | 70.035                              | 44.885                    | 35.125                                  |
| 2                  | 88.085                                        | 64.418                              | 40.574                    | 34.296                                  |
| 3                  | 89.597                                        | 66.761                              | 41.869                    | 35.384                                  |
| 4                  | 89.527                                        | 71.183                              | 43.915                    | 36.002                                  |
| 5                  | 84.874                                        | 65.449                              | 41.08                     | 33.952                                  |
| 6                  | 90.64                                         | 69.361                              | 41.989                    | 38.006                                  |
| mean ± SD          | 88.525 ± 2.008                                | 67.868 ± 2.716                      | 42.385 ± 1.673            | 35.461 ± 1.451                          |
