# Supplementary material for: A spectral-domain optical coherence tomographic analysis of Rdh5-/- mice retina
Source: PubMed Central journal article supplement (PMC7144952; doi:10.1371/journal.pone.0231220), 2020-04-09
Supplement: pone.0231220.s003.pdf [file pone.0231220.s003.pdf]

Retinal layer thickness of *Rdh5*<sup>-/-</sup>

| Age (PM)<br>number | Inner Retinal Layer (A)<br>NFL, GCL, IPL, INL | Outer Retinal Layer (B)<br>OPL, ONL | IS/OS Layer (C)<br>IS, OS | RPE + choroid Layer (D)<br>RPE, choroid |
|--------------------|-----------------------------------------------|-------------------------------------|---------------------------|-----------------------------------------|
| PM1                |                                               |                                     |                           |                                         |
| 1                  | 79.426                                        | 57.610                              | 35.466                    | 36.223                                  |
| 2                  | 84.458                                        | 54.607                              | 38.795                    | 33.197                                  |
| 3                  | 83.194                                        | 56.211                              | 35.591                    | 36.913                                  |
| 4                  | 85.334                                        | 53.941                              | 38.690                    | 28.638                                  |
| 5                  | 80.789                                        | 56.793                              | 34.381                    | 28.903                                  |
| 6                  | 75.686                                        | 54.081                              | 33.990                    | 32.007                                  |
| mean ± SD          | 81.481 ± 3.604                                | 55.541 ± 1.540                      | 36.152 ± 2.098            | 32.647 ± 3.515                          |
| PM2                |                                               |                                     |                           |                                         |
| 1                  | 83.451                                        | 61.407                              | 35.693                    | 36.832                                  |
| 2                  | 83.895                                        | 58.619                              | 38.888                    | 32.242                                  |
| 3                  | 81.526                                        | 56.524                              | 39.922                    | 29.860                                  |
| 4                  | 81.796                                        | 59.320                              | 33.019                    | 34.356                                  |
| 5                  | 77.959                                        | 55.550                              | 36.181                    | 28.212                                  |
| 6                  | 78.577                                        | 56.402                              | 34.744                    | 33.140                                  |
| mean ± SD          | 81.196 ± 2.455                                | 57.970 ± 2.212                      | 36.408 ± 2.581            | 32.440 ± 3.099                          |
| PM3                |                                               |                                     |                           |                                         |
| 1                  | 81.513                                        | 56.838                              | 40.441                    | 32.766                                  |
| 2                  | 79.442                                        | 54.638                              | 39.648                    | 32.843                                  |
| 3                  | 82.777                                        | 57.359                              | 38.980                    | 33.519                                  |
| 4                  | 83.775                                        | 57.770                              | 41.678                    | 32.559                                  |
| 5                  | 84.620                                        | 55.087                              | 42.913                    | 36.298                                  |
| 6                  | 85.011                                        | 53.707                              | 39.985                    | 35.227                                  |
| mean ± SD          | 82.856 ± 2.101                                | 55.900 ± 1.647                      | 40.608 ± 1.445            | 33.869 ± 1.540                          |
| PM4                |                                               |                                     |                           |                                         |
| 1                  | 95.821                                        | 56.427                              | 35.003                    | 30.783                                  |
| 2                  | 92.339                                        | 52.093                              | 42.374                    | 29.853                                  |
| 3                  | 82.258                                        | 52.746                              | 37.439                    | 25.114                                  |
| 4                  | 80.636                                        | 54.141                              | 37.524                    | 23.952                                  |
| 5                  | 78.328                                        | 53.339                              | 41.327                    | 27.224                                  |
| 6                  | 77.933                                        | 54.164                              | 37.253                    | 33.282                                  |
| 7                  | 81.714                                        | 52.327                              | 37.423                    | 25.868                                  |
| 8                  | 84.658                                        | 52.580                              | 38.840                    | 32.631                                  |
| mean ± SD          | 84.211 ± 6.524                                | 53.477 ± 1.425                      | 38.398 ± 2.392            | 28.588 ± 3.538                          |
| PM5                |                                               |                                     |                           |                                         |
| 1                  | 81.359                                        | 54.648                              | 35.715                    | 34.309                                  |
| 2                  | 86.848                                        | 48.183                              | 37.351                    | 32.566                                  |
| 3                  | 84.001                                        | 49.121                              | 38.206                    | 33.899                                  |
| 4                  | 81.576                                        | 50.624                              | 38.382                    | 33.837                                  |
| mean ± SD          | 83.446 ± 2.565                                | 50.644 ± 2.852                      | 37.414 ± 1.219            | 33.653 ± 0.754                          |
| PM6                |                                               |                                     |                           |                                         |
| 1                  | 81.12                                         | 56.12                               | 35.8                      | 34.51                                   |
| 2                  | 80.58                                         | 62.61                               | 42.24                     | 31.14                                   |
| 3                  | 80.46                                         | 53.53                               | 40.18                     | 33.6                                    |
| 4                  | 85.52                                         | 56                                  | 42.16                     | 35.2                                    |
| 5                  | 80.08                                         | 57.69                               | 38.84                     | 32.73                                   |
| 6                  | 77.22                                         | 56.7                                | 36.7                      | 32.38                                   |
| mean ± SD          | 80.829 ± 2.679                                | 57.104 ± 2.101                      | 39.319 ± 2.713            | 33.258 ± 1.483                          |
